1 Research article

2

3 Title: Atlas of tissue-specific and tissue-preferential gene expression in ecologically and  
4 economically significant conifer *Pinus sylvestris*

5

6 Authors

7 Sandra Cervantes<sup>1,2</sup>, Jaana Vuosku<sup>1</sup>, Dorota Paczesniak<sup>1</sup>, Tanja Pyhäjärvi<sup>\*1</sup>

8 <sup>1</sup>Department of Ecology and Genetics, University of Oulu, Finland; <sup>2</sup>Biocenter Oulu, University of  
9 Oulu, Finland.

10

11

12

13 \*Corresponding author

14

15

16

17

18

19

20

21

22

23

## 24 **Abstract**

25 **Background:** Despite their ecological and economical importance, conifers still have limited  
26 genomic resources, mainly due to the large size and complexity of their genomes. In addition,  
27 several of the available genomic resources lack complete structural and functional annotation.  
28 Transcriptomic resources have been commonly used to compensate for these deficiencies, though  
29 for most conifer species the currently available transcriptomes are limited to a small number of  
30 tissues, or capture only a fraction of the genes present in the genome.

31 **Results:** Here we provide an atlas of gene expression patterns for conifer *Pinus sylvestris* grown  
32 under natural conditions across five tissues: embryo, megagametophyte, needle, phloem, and  
33 vegetative bud. Compared to previous studies, we used a wider range of tissues and focused our  
34 analyses on the expression profiles of genes at tissue level. We provide comprehensive information  
35 of the per-tissue normalized expression level, and indication of tissue preferential upregulation or  
36 tissue preferential expression. We identified a total of 48,001 tissue preferentially upregulated and  
37 tissue specifically expressed genes, of which 28% have annotation in the Swiss-Prot database. The  
38 annotated genes were associated with a total of 84,498 GO terms, of which 1,834 had significant  
39 enrichment in different processes and functions, for example glyoxylate cycle in megagametophyte  
40 and defense response in needle. Even though most of the genes originating from the transcriptome  
41 do not have functional information in current biological databases, the tissue-specific patterns  
42 identified here provide valuable information about their potential functions for further studies.

43 **Conclusions:** The genes identified in this study will contribute to improve the annotation of the  
44 already available and forthcoming conifer genomes. This atlas of gene expression also provides  
45 ground to further the research in the areas of plant physiology, population genetics, and genomics  
46 in general. As we provide information on tissue specificity at both diploid and haploid life stages, our

47 data will also contribute to the understanding of evolutionary rates of different tissue types and  
48 ploidy levels.

49 **Keywords:** Scots pine, RNA-seq, *Pinus sylvestris*, tissue-specific gene expression, conifer,  
50 transcriptomics, needle, phloem, megagametophyte, embryo, vegetative bud

51

## 52 **Background**

53 Conifers, a clade within the gymnosperms, represent a group of plants with significant  
54 economic and ecological relevance [1]. Several coniferous trees are among the most important  
55 sources of wood and timber, as for example *Pinus* and *Picea* [2, 3]. Conifers dominate boreal  
56 forests worldwide and can form large forested areas hosting a variety of ecosystems. Furthermore,  
57 conifer forests are one of the major ecosystem services providers and they are crucial for carbon  
58 sequestration [2, 4–6]. Despite their importance, genomic resources for conifers, and gymnosperms  
59 in general, lag behind in availability compared to angiosperms. Although several contributions have  
60 been made recently to fill this gap [7–11], conifer genome annotation remains a challenge, with both  
61 structural and functional annotations being far from perfect [12, 13]. Conifer genomics resources  
62 are limited due to the large size of their genomes, ranging from 8 to 70 Gbp [14] and to the large  
63 number of repetitive elements (approximately 80%) within them [7, 15, 16]. Proper and complete  
64 annotation of the conifer genomes has also been complicated by the presence of long introns [7,  
65 13], which prevents the routine use of common annotation software. Moreover, analyses of ortholog  
66 genes across different species indicate that there are several gene groups which are unique to  
67 conifers or conifer species specific, with no well-defined homologs in any of the angiosperm plant  
68 models [7, 13, 16, 17].

69 Transcriptomic resources have been particularly important for research in conifers and other  
70 non-model species, as a strategy to compensate for the challenges associated with efficient  
71 genome assembly and annotation [12, 18]. As the biological functions can not be directly inferred  
72 from nucleotide sequences, reference transcriptomes and gene expression studies are useful in the  
73 identification and annotation of genes [13, 19–22]. Transcriptome information can also be used in  
74 conifers that lack reference genomes, as this information can be used in the design of reduced  
75 genome representation targets [23, 24]. In addition to this, RNA-seq analyses allow the identification  
76 of expression patterns and expression levels, which are essential components of evolutionary  
77 genomics studies. For example, selective constraints in genes can be inferred from their expression  
78 patterns, as both breadth and expression level are known determinants of evolutionary rates [25,  
79 26]. Selective constraints are also expected to differ between haploid and diploid tissues which  
80 differ in the relative rate of expression, as tissue specificity and ploidy has potentially drastic effects  
81 on the dynamics of e.g. purifying selection [27].

82 Here we give a first glimpse of the expression patterns of tissue preferentially upregulated  
83 (PUR) and tissue specifically expressed genes across five tissues (embryo, megagametophyte,  
84 needle, phloem, and vegetative bud) of *Pinus sylvestris*. *P. sylvestris* is a widely distributed conifer  
85 of large economic and ecological importance in Northern Eurasia [28]. *P. sylvestris* is one of the  
86 main sources of timber and raw material for the pulp and paper industry in Europe and is a  
87 dominant species in boreal forests, with an estimated coverage area of 145 millions hectares [28].  
88 *P. sylvestris* is also a suitable model to answer evolutionary and genetic questions, especially  
89 regarding gymnosperm reproductive biology, its evolution and genetic consequences. For example,  
90 in conifers the maternal nuclear haplotype of an embryo is identical to the megagametophyte's  
91 nuclear haplotype [29], which makes it possible to separate expression of paternal and maternal  
92 haplotypes and alleles in the embryo [30].

93           Despite its importance and potential, *P. sylvestris* still lacks a reference genome, and  
94   currently there are limited genomic resources for this species (see however [20, 31–35]). To date,  
95   the few transcriptomic studies of *P. sylvestris* have been based on a small number of tissue types  
96   such as needles or seed tissues [20, 32]. Identification of tissue preferentially upregulated and  
97   tissue specific genes is relevant because 1) understanding the different patterns of expression  
98   across different kinds of tissues can aid to elucidate the organization of transcriptomes [19]. 2)  
99   Knowing the different profiles of expression across tissues can set the ground for evolutionary  
100   analysis, as it is known from studies in mammals and angiosperms that the evolution of gene  
101   expression differs across tissues or organs [36, 37]. Ultimately this knowledge will help to gain a  
102   deeper understanding of the determinants and main factors that affect the rate of adaptive evolution  
103   and the dynamics at the genome level.

104           In this study we 1) provide a comparative transcriptomic resource for *P. sylvestris* describing  
105   the expression level in five different tissues, 2) identify genes that are tissue preferentially  
106   upregulated and tissue specifically expressed in each of the five tissues, 3) provide quantitative  
107   measures of tissue-specific expression for each gene per tissue combination, and 4) conduct gene  
108   ontology enrichment analysis for each tissue type. Our results are important for future studies in  
109   comparative conifer genomics, plant physiology, population genetic analyses, evolutionary genetic  
110   studies, further gene expression analyses, and aid in the annotation of present and forthcoming  
111   conifer genome sequences.

112

## 113   **Results and discussion**

### 114   **Transcript quantification and abundance matrices construction**

115   We mapped a total of 707,063,773 trimmed and adapter removed reads from five different tissues  
116   (embryo, megagametophyte, needle, phloem, and vegetative bud) and six biological replicates (six

117 different genotypes) per tissue type to *P. sylvestris* TRINITYguided transcriptome [33]. On average  
118 23,568,792 reads originated from each tissue, ranging from 29,591,629 reads for needle to  
119 20,469,80 reads for phloem. On average 76% of the reads per replicate were successfully mapped  
120 to the reference (Table S1). After mapping 1,307,500 contigs had aligned reads at the isoform level.  
121 Of those, 120,040 contigs were removed from the downstream analyses as they were identified as  
122 contaminants (Data S1). The final set consisted of 1,187,460 contigs at isoform level and were used  
123 to construct raw counts and normalized matrices at gene level for downstream analyses (see  
124 Methods section). The total number of putative genes with expression signal in the gene level  
125 matrices was 715,398, much higher than the number of annotated genes in any conifer [7, 16, 38].  
126 This magnitude, albeit probably an overestimate, is typical to transcriptome studies [21]. This is  
127 likely a result of single genes being present in multiple fragments, isoforms split into multiple genes,  
128 and different alleles originating from heterozygous material identified as separate genes during  
129 assembly and classification as genes by Trinity [33]. However, part of the genes originate from gene  
130 families and since clustering similar genes is possible in downstream analysis, we chose to err on  
131 the side of potentially over splitting the genes rather than imperfectly clustering similar transcripts as  
132 a single gene, as over clustering will inherently lead to loss of information. We believe that  
133 providing expression data with minimum clustering will be most versatile for later use of the  
134 transcriptome and expression data in genome annotations and other studies.

135

### 136 **Quality assessment of biological replicates**

137 As we used different genotypes as biological replicates, we first verified that the replicates clustered  
138 by tissue type and not by genotype, and checked for the presence of potential outliers in the  
139 dataset. We used the raw counts matrix data (Table S2), a principal component analysis (PCA) and  
140 a Pearson correlation to verify this. The PCA separated the tissue samples into five distinct clusters

141 without any overlap, indicating that among-tissue variation is the main factor of among-sample  
142 variation (Figure 1). Hence, our approach captures the differentiating gene expression profiles of the  
143 five tissues. In the PCA, the seed-derived megagametophyte and embryo samples clustered closest  
144 to each other, suggesting similarity in their gene expression profiles. Also phloem and bud samples  
145 clustered close to each other, whereas needle samples showed the most unique gene expression  
146 profile. In the hierarchical clustering analysis, based on the correlations of gene expression profiles,  
147 the differences among tissues are relatively shallow. But, similarly to the PCA, all replicates are  
148 clustered according to their tissue type and not according to their genotypes, corroborating the PCA  
149 results (Figure S1).

150

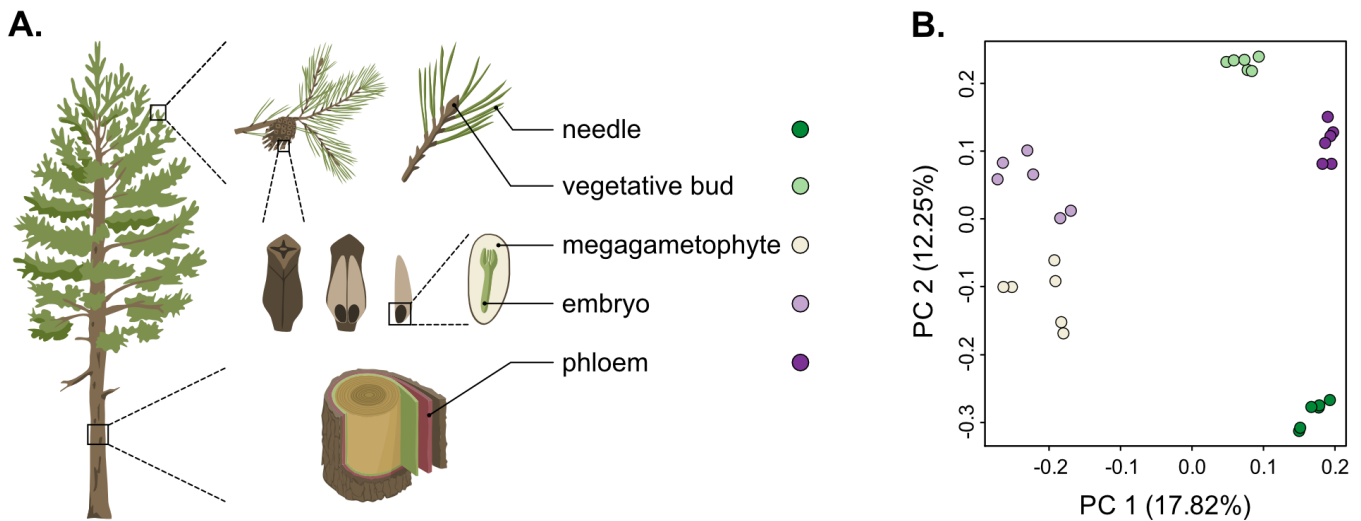

151

152 **Figure 1.** A. Schematic representation of the five tissues used in the transcriptome profiling of *Pinus*  
153 *sylvestris*: needle, vegetative bud, megagametophyte, embryo and phloem. B. Scatterplot of the first  
154 two axes of the principal component analysis (PCA). Tissue types are denoted by colors.

## 155 **Tissue preferentially upregulated and tissue-specific gene expression**

156 We defined a gene as tissue PUR when there was a significant log fold change in the expression  
157 value compared to the other tissues. To identify tissue PUR we first did a differential expression  
158 (DE) analysis. For this we included all the genes in the raw count matrix (Table S2). We decided not  
159 to apply any minimum number of counts per gene as a filtering threshold to run the analysis, as we  
160 later applied a 5% false discovery rate (FDR) threshold for the identification of PUR genes. Out of  
161 the 715,398 genes initially included in the DE analysis, 198,413 genes had a maximum 5% FDR for  
162 differential expression and were further included in the analysis to identify PUR genes. We identified  
163 a total of 48,001 genes with tissue preferential expression, and out of the five tissues needle has  
164 the highest number of PUR genes (Table 1)

165 Quantification of tissue specificity allows a powerful statistical analysis of correlation between  
166 tissue-specific expression and e.g. evolutionary rate or other dependent or explanatory variables  
167 and factors. We identified the tissue specifically expressed genes by calculating the  $\tau$  score per  
168 gene. The score ranges from zero to one, with a zero given to genes expressed in all tissues and  
169 one given to completely tissue specific genes. For this analysis we retained a set of 177,075 genes  
170 (Table S3) after applying the filtering criteria described in Methods. We considered a gene as tissue  
171 specifically expressed only if its  $\tau=1$ . We identified a total of 3,899 genes with a tissue-specific  
172 pattern of expression, similarly the PUR analysis results, needle has the highest number of tissue-  
173 specific genes (Table 1). To obtain the annotation of the genes identified as tissue PUR and tissue  
174 specific, we retrieved the corresponding UniProtKB identifiers [39] from the Trinotate for the 715,398  
175 putative genes in the TMM count matrix, out of which 97,435 (14 %) had a Swiss-Prot [40] protein  
176 match based on BLASTX [33]. Most of the Swiss-Prot annotations (67%) originated from  
177 *Arabidopsis thaliana* (65,214 genes). Other common annotation sources were *Nicotiana tabacum*  
178 (9,794; 10%) and *Oryza sativa* (8,946; 9%). Only 1663 genes (1.7%) had an annotation to other



179 *Pinus* species, of which 177 (10.6%) were hits to *P. sylvestris*, and 608 (36.5%) genes had Swiss-  
180 Prot annotation to *Picea*. Note that Swiss-Prot is a manually curated database that does not  
181 currently have a comprehensive set of annotated gymnosperm proteins and therefore the best  
182 matches are often obtained from the model plants such as *A. thaliana*. A proportion of our putative  
183 genes share the same gene identifier (annotation) (Table 1). This probably reflects the incomplete  
184 collapse of different isoforms in the assembled transcriptome used as reference, or the presence of  
185 gene families [13]. Also, a high number of the genes identified as PUR or tissue specific lack  
186 annotation altogether, which is not surprising as genes with higher tissue-specific expression have  
187 less conserved sequences and are less likely to find orthologs among other species [19, 41]. A  
188 summary of the 715,398 genes indicating their normalized expression level (TMM),  $\tau$  score, tissue  
189 specificity status, PUR status, and annotation can be found in the Supplementary information (Table  
190 S4).

191       Cursory inspection of annotations of highly expressed tissue PUR and tissue-specific genes  
192 are congruent with some of the already known functions of the tissues. These results confirm that  
193 our analyses capture biologically meaningful characteristics of the tissues. For example in  
194 megagametophytes, enzymes related to seed storage lipid mobilization and germination were  
195 upregulated and specifically expressed. Similarly, in needles, several chlorophyll a-b binding  
196 proteins are upregulated. In embryo, multiple ribosomal proteins and other proteins indicating active  
197 protein synthesis were upregulated. In vegetative buds, expression of genes involved in defense  
198 against insect attack, like (-)-alpha-pinene synthase and dirigent [42] that take part in oleoresin  
199 synthesis, were highly expressed and specific to this tissue. In phloem, the two genes annotated as  
200 metallothionein-like protein EMB30, an aquaporin and a thioredoxin-like protein were highly  
201 expressed, similarly to *Quercus suber* phellem (cork) where metallothionein reacts to oxidative  
202 stress [43] or in *Pinus taeda* xylem where the same proteins were among the most highly expressed  
203 genes [44].

tissue



10 most enriched/significant biological processes

10 most highly expressed genes  
in bold: preferentially upregulated genes

PROCESSES

GENES

mega-gametophyte



GO:0006097 Glyoxylate cycle  
GO:0046487 Glyoxylate metabolic process  
GO:0044242 Cellular lipid catabolic process  
GO:0009109 Coenzyme catabolic process  
GO:0006099 Tricarboxylic acid cycle  
GO:0046356 Acetyl-CoA catabolic process  
GO:0009062 Fatty acid catabolic process  
GO:0019395 Fatty acid oxidation  
GO:0006635 Fatty acid beta-oxidation  
GO:0016042 Lipid catabolic process

**Antimicrobial peptide 1**  
Metallothionein-like protein EMB30  
Cysteine proteinase 15A  
**Antifungal protein ginkbilobin-2**  
Glycine-rich RNA-binding protein GRP1A  
**Malate dehydrogenase**  
**Non-specific lipid-transfer protein 1**  
**3-ketoacyl-CoA thiolase 2, peroxisomal**  
**Isocitrate lyase**  
Catalase

PROCESSES

GENES

vegetative bud



GO:0071555 Cell wall organization  
GO:0071554 Cell wall organization or biogenesis  
GO:0009698 Phenylpropanoid metabolic process  
GO:0009699 Phenylpropanoid biosynthetic process  
GO:0071669 Plant-type cell wall organization or biogenesis  
GO:0005976 Polysaccharide metabolic process  
GO:0070882 Cellular cell wall organization or biogenesis  
GO:0042546 Cell wall biogenesis  
GO:0044264 Cellular polysaccharide metabolic process  
GO:0010383 Cell wall polysaccharide metabolic process

Glycine-rich RNA-binding protein GRP1A  
Chlorophyll a-b binding protein 16, chloroplastic  
Metallothionein-like protein EMB30  
**Abscisic stress-ripening protein 1**  
**Cold shock domain-containing protein 4**  
Cysteine proteinase 15A  
**Major pollen allergen Bet v 1-A**  
**S-adenosylmethionine decarboxylase proenzyme**  
Non-specific lipid-transfer protein  
**High mobility group B protein 2**

PROCESSES

GENES

embryo



GO:0009451 RNA modification  
GO:0006412 Translation  
GO:0042254 Ribosome biogenesis  
GO:0022613 Ribonucleoprotein complex biogenesis  
GO:0006260 DNA replication  
GO:0016554 Cytidine to uridine editing  
GO:0006261 DNA-dependent DNA replication  
GO:0009813 Flavonoid biosynthetic process  
GO:0016553 Base conversion or substitution editing  
GO:0010467 Gene expression

Glycine-rich RNA-binding protein GRP1A  
Cold shock domain-containing protein 4  
**60S ribosomal protein L36-1**  
Metallothionein-like protein EMB30  
Translationally-controlled tumor protein homolog  
Non-specific lipid-transfer protein  
Chlorophyll a-b binding protein 1A, chloroplastic  
Non-specific lipid-transfer protein 2  
Ribulose biphosphate carboxylase small chain, chloroplastic  
60S acidic ribosomal protein P1

PROCESSES

GENES

needle



GO:0015979 Photosynthesis  
GO:0042440 Pigment metabolic process  
GO:0006952 Defense response  
GO:0046148 Pigment biosynthetic process  
GO:0019684 Photosynthesis, light reaction  
GO:0009657 Plastid organization  
GO:0009658 Chloroplast organization  
GO:0009765 Photosynthesis, light harvesting  
GO:0009617 Response to bacterium  
GO:0019748 Secondary metabolic process

**Metallothionein-like protein type 3**  
**Ribulose biphosphate carboxylase small chain, chloroplastic**  
**Chlorophyll a-b binding protein 16, chloroplastic**  
**Chlorophyll a-b binding protein type 2 member 1B, chloroplastic**  
**Galactinol synthase 4**  
**RuBisCO activase 1, chloroplastic**  
**Beta carbonic anhydrase 4**  
**Chlorophyll a-b binding protein type I, chloroplastic**  
**Carbonic anhydrase, chloroplastic**  
**Chlorophyll a-b binding protein 1A, chloroplastic**

PROCESSES

GENES

phloem



GO:0006952 Defense response  
GO:0050896 Response to stimulus  
GO:0051707 Response to other organism  
GO:0006950 Response to stress  
GO:0006468 Protein amino acid phosphorylation  
GO:0009607 Response to biotic stimulus  
GO:0042221 Response to chemical stimulus  
GO:0051704 Multi-organism process  
GO:0046777 Protein amino acid autophosphorylation  
GO:0070887 Cellular response to chemical stimulus

**Metallothionein-like protein EMB30**  
Glycine-rich RNA-binding protein GRP1A  
**Non-specific lipid-transfer protein 4**  
Cysteine proteinase 15A  
**Translationally-controlled tumor protein homolog**  
**17.8 kDa class I heat shock protein**  
Cold shock domain-containing protein 4  
**Catalase**  
Granule-bound starch synthase 1, chloroplastic/amyloplastic  
**Dormancy-associated protein 1**

PROCESSES

GENES

205 **Figure 2.** Ten most significantly enriched biological processes (with corresponding GO-term IDs)  
206 and ten most highly expressed annotated genes in each of the five tissues. Genes preferentially  
207 upregulated (PUR) in a given tissue are in bold.

208

209 Among the five tissues analysed, the needle had the highest number of genes with tissue-  
210 specific expression and embryo the lowest (Table 1). Except for two genes, one in  
211 megagametophyte and one in needle, all the genes with tissue-specific expression were also  
212 among the PUR genes. However, as tissue specificity does not require a high expression level,  
213 genes with  $\tau$  score equal to one are not necessarily the most upregulated genes in their respective  
214 tissues. Comparison of our findings to other studies is not straightforward as there are very few  
215 transcriptomic studies in *P. sylvestris*. But in comparison to a previous study [20], where they focus  
216 on the comparison between megagametophyte and embryo tissues at different developmental  
217 stages, we identified less megagametophyte and embryo specifically expressed genes. One of the  
218 reasons for this difference could be that the identification of unique genes in the previous study [20]  
219 was based only on the comparison between embryo and megagametophyte tissues. As the  
220 identification of tissue specific genes is contingent to the number of tissues used for the analysis, it  
221 is expected that the higher the number of tissues used in the comparison, the lower the number of  
222 tissue specific genes that will be identified. In contrast, we found a higher number of tissue specific  
223 genes in embryo, bud, and needle compared to a previous study in conifers [19], where several  
224 tissue types were used. One notable difference between this [19] and ours was the higher number  
225 of tissue-specific genes for megagametophyte found in *P. glauca*. This analysis [19] found the  
226 highest number of unique genes in the megagametophyte in comparison to other tissues analyzed.  
227 The low number of megagametophyte specific genes identified in our study could be due to the use  
228 of mature embryos as starting material. Previous research suggests that the number of unique  
229 transcripts in the megagametophyte varies during the developmental stages of embryogenesis [20].

230 One caveat of our analyses is that, unlike other studies, we did not use microdissection in  
231 order to obtain the tissue samples [22]. Hence, some of the “tissues” are a mix of tissue types.  
232 Needles, for example, include several tissues (phloem among them) [45], and mature embryos  
233 contain the shoot and root meristems as well as cotyledons [46]. In contrast, the mature  
234 megagametophyte is a quite uniform storage tissue consisting of cells packed with starch protein  
235 and lipids [47, 48]. Another limitation of the dataset is that it represents only one point in time and  
236 space, although gene expression is a dynamic process and quantitative and qualitative variations  
237 exist over spatial and temporal scales. Instead of sampling across several developmental stages or  
238 across a spatial gradient our dataset represents a wider set of tissues, which increases the power to  
239 identify tissue PUR and tissue specifically expressed genes. The added value of the dataset lies in  
240 the unexpected functions and connections discovered among biological pathways and genes with  
241 previously unidentified signals of tissue-specificity or up-regulation.

242

243 **Table 1.** Number of genes identified as tissue preferentially upregulated and tissue-specific in five  
244 *P. sylvestris* tissues. The percentage of unique UniProtKB identifiers is also shown.

|                 | Tissue preferentially upregulated genes |           |            | Tissue specifically expressed genes |           |            |
|-----------------|-----------------------------------------|-----------|------------|-------------------------------------|-----------|------------|
|                 | Total                                   | Annotated | Unique (%) | Total                               | Annotated | Unique (%) |
| Bud             | 8225                                    | 2515      | 30.6       | 693                                 | 342       | 49.3       |
| Embryo          | 10430                                   | 2820      | 27.0       | 498                                 | 206       | 41.3       |
| Megagametophyte | 7171                                    | 1515      | 21.1       | 679                                 | 220       | 32.4       |
| Needle          | 13128                                   | 3993      | 30.4       | 1495                                | 603       | 40.3       |
| Phloem          | 9047                                    | 2603      | 28.7       | 534                                 | 202       | 37.8       |

245

246 **Functional characterization of tissue preferentially upregulated and tissue-specific genes**

247 GO enrichment analysis allows the identification of gene functions enriched with certain functional  
 248 roles. The number of enriched functions was of the same magnitude across tissue types, ranging  
 249 from 253 to 452 for PUR genes and from 58 to 169 for tissue-specific genes (Tables S5-S14). The  
 250 total number of GO terms and the number of significant enriched terms per tissue are shown in  
 251 Table 2, a summary of the most highly expressed genes per tissue, and the most significantly  
 252 enriched biological processes is shown in Figure 2. Most of the genes (86%) with expression  
 253 signals in our study lacked annotation from the Trinotate pipeline. Thus, they did not contribute to  
 254 functional analysis or GO enrichment results.

255 The complete lists of gene identifiers and their corresponding GO terms per tissue and per  
 256 each set of genes (Data S2-S11), along with tables with the results of the SEA showing each GO  
 257 terms, its p-value, and FDR (Table S5-S14) are provided Supplementary information.

258

259 **Table 2.** Total number and number of significant GO terms and percentage of enriched terms in *P.*  
 260 *sylvestris* tissues.

|                 | Tissue preferentially upregulated genes |             |                | Tissue-specific genes |             |                |
|-----------------|-----------------------------------------|-------------|----------------|-----------------------|-------------|----------------|
|                 | Total                                   | Significant | Percentage (%) | Total                 | Significant | Percentage (%) |
| Bud             | 15681                                   | 452         | 2.9            | 2019                  | 137         | 6.7            |
| Embryo          | 17461                                   | 253         | 1.4            | 1178                  | 75          | 6.4            |
| Megagametophyte | 9690                                    | 306         | 3.1            | 1363                  | 111         | 8.1            |
| Needle          | 25295                                   | 401         | 1.6            | 3818                  | 169         | 4.3            |
| Phloem          | 16371                                   | 422         | 2.6            | 1249                  | 58          | 4.6            |

261

262 In needles the significant GO terms reflected the exposure of trees to various stresses and  
263 interactions with other organisms, whereas in embryos, buds and the phloem significant GO terms  
264 were mainly connected to different development-related processes. In needles the enriched  
265 biological process GO terms among tissue-specific genes were immune response (GO:0006955) as  
266 well as response to stress (GO:0006950) and other organisms (GO:0051707) such as oomycetes  
267 (GO:0002229), bacteria (GO:0042742) and fungi (GO:0009817). Moreover, terpene synthase  
268 activity (GO:0010333), which may play a key role in the defense against herbivores [49], was an  
269 enriched molecular function among tissue-specific genes in needles, but also in embryos and  
270 vegetative buds. For example, reactive oxygen species (ROS) related biological processes  
271 (GO:0006800, GO:0042743, GO:0034614) and molecular functions (GO:0004601, GO:0004364)  
272 were enriched among the tissue-specific genes in embryos consistent with an active ROS protection  
273 in developing tissues. In the phloem, a special differentiation process, syncytium formation  
274 (GO:0006949), indicating the interconnection of phloem sieve elements to generate a transport  
275 route [50] was an enriched biological process among the tissue specific genes.

276

### 277 **Megagametophyte-specific genes have crucial functions in seed germination and energy** 278 **conversion**

279 Gymnosperms are characterized by the haploid female gametophyte tissue, the megagametophyte,  
280 which surrounds the embryo in developing and mature seeds. The megagametophyte can be  
281 considered a functional homolog of the endosperm in angiosperms due to its role as a nourishing  
282 tissue [51, 52]. However, the megagametophyte develops from a haploid megaspore before the  
283 fertilization [46] and is therefore entirely maternally inherited unlike the diploid or triploid  
284 endosperms of biparental origin [53, 54]. To give an example of the potential uses of the dataset,  
285 we provide a more detailed description of the megagametophyte expression profile, but leave the in-  
286 depth analysis of the other tissues for later investigations.

287 Among highly expressed and up-regulated genes in the megagametophyte were malate  
288 synthase (EC 2.3.3.9) and isocitrate lyase (EC 4.1.3.1) that are essential in glyoxylate cycle  
289 converting lipids into carbohydrates in seeds [55], as well as other glyoxysomal proteins like Acetyl-  
290 CoA acyltransferase (EC 2.3.1.16), ABC transporter and peroxisomal fatty acid beta-oxidation  
291 multifunctional protein AIM1 [56]. Seed storage related genes such as 2S seed storage-like protein,  
292 11S globulin seed storage protein 2 and 13S globulin basic chain and some isocitrate lyase copies  
293 were completely megagametophyte-specific ( $\tau=1$ ). Antimicrobial and antifungal protein coding  
294 genes were the most highly expressed among annotated megagametophyte-upregulated genes.

295 The enriched GO terms of biological processes and molecular functions in the  
296 megagametophyte tissue-specific genes included seed germination and the mobilization of nutrient  
297 reserves. Nutrient reservoir activity (GO:0045735) indicated the mobilization of energy sources from  
298 the megagametophyte for seed germination and early seedling growth, as well as lipid catabolic  
299 processes (e.g. GO: 0016042, GO:0044242). Malate dehydrogenase activity (GO:0016615) and  
300 heme binding (GO:0020037), which mostly originated from the cytochrome P450 enzymes  
301 containing heme cofactors [57], reflected the resume of active metabolism. Also, response to ROS  
302 (GO:0034614) and antioxidant activity (GO:0016209) suggested active metabolism and signaling.  
303 ROS are natural by-products of metabolism and may be detrimental to seed viability because they  
304 can cause oxidative stress. However, in the seed ROS also work as signals which underpin the  
305 breaking of dormancy and provide protection against pathogens [58]. Megagametophyte cells  
306 showed responses to hormone stimulus (GO: 0032870) and the function of hormone-mediated  
307 signaling pathways (GO:0009755) including abscisic acid (GO:0009738), auxin (GO:0009734) and  
308 ethylene (GO:0009873) which also belong to the molecular networks regulating seed dormancy and  
309 germination [59–62]. Cellulose biosynthetic process (GO:0030244) and primary cell wall biogenesis  
310 (GO:0009833) suggest that cell walls in the megagametophyte may participate in water retention  
311 and give mechanical support to the germinating embryo [63]. Similarly to previous findings in *P.*

312 *sylvestris* [20] megagametophytes, we found enrichment for processes involved in the response to  
313 chemical and endogenous stimuli (GO:0042221, GO:0071495 ). Merino et al. (2016) [20] suggested  
314 that the megagametophyte could also be involved in the regulation of the embryo development  
315 through the induction of signaling pathways triggered by sensing environmental signals in a similar  
316 way the angiosperms' endosperm does [64]. Altogether, our findings show that the  
317 megagametophyte is not just a reserve nutrition for the germinating embryo, but a metabolically  
318 active tissue contributing in multiple ways to seed germination and, thus, underline the importance  
319 of the haploid stage in *P. sylvestris* life cycle.

320 Several enzymes widely used in allozyme-based population genetic studies ([65] and  
321 references therein) such as aconitate hydratase (EC 4.2.1.3), malate dehydrogenase (EC 1.1.1.37)  
322 and aspartate aminotransferase (EC 2.6.1.1) were megagametophyte-specific and among the top  
323 50 expressed genes in the tissue. As they may be more prone to natural selection against recessive  
324 deleterious variants when expressed at the haploid stage, early population genetic analyses may  
325 have bias in e.g. estimates of the overall genetic diversity based on these loci.

## 326 **Conclusions**

327 We provide a widely and interdisciplinary applicable genome-wide atlas of tissue-level transcription  
328 patterns based on RNA-seq for economically and ecologically significant coniferous tree *P.*  
329 *sylvestris*. Quantitative data and analysis of expression level, as well as breadth and tissue  
330 specificity are provided for 715,398 different putative genes. The mapping and bioinformatic  
331 analyses of gene expression are based on the most complete and high-quality reference  
332 transcriptome of *P. sylvestris* available to date [33]. Previous transcriptome studies of *P. sylvestris*  
333 have concentrated on a narrow set of tissues in each study such as wood [66], embryo [20], and  
334 needles [32, 67] or focused on a limited set of genes [68]. The present study allows comparison



335 across a wide set of genes expressed in the above-ground parts of adult *P. sylvestris* trees growing  
336 in a natural forest.

337 In addition to genome sequence annotations, we foresee multiple potential uses for the  
338 dataset. Level and breadth of gene expression are known to be linked to the evolutionary rate and  
339 level of conservation (ref). By combining our data with similar data in other conifers or angiosperms  
340 it is possible to study the evolutionary conservation of expression patterns, or the differences in  
341 evolutionary rates across tissue-specific expression levels and gain a deeper understanding of the  
342 determinants and main factors affecting e.g. rate of adaptive evolution and dynamics at the genome  
343 level. The response of trees to a combination of different stresses is unique and cannot be directly  
344 extrapolated from studying only single stressors in experimental conditions [69]. The transcriptome  
345 resource for adult *P. sylvestris* trees growing under natural conditions, where they are  
346 simultaneously exposed to a number of different abiotic and biotic stresses as well as interactions  
347 with other organisms, provides a valuable tool also for physiological studies. Finally, un-annotated  
348 conifer genes with high expression or tissue specificity can open up whole new research avenues,  
349 independent of the previously available knowledge based on angiosperm model plants such as *A.*  
350 *thaliana* and *Populus*.

351

352

## 353 **Methods**

### 354 **Plant material**

355 During the growing season of 2016 (May 26th-27th), we sampled needles, phloem, and vegetative  
356 buds (called tissues for brevity, but see results and discussion section) from six non-related adult  
357 *Pinus sylvestris* trees growing at the Punkaharju Intensively Studied Site (ISS) [70] in Southern  
358 Finland, resulting in total of 30 samples (Table S15). The same plant material and sequenced

359 libraries have been used previously to assemble multiple reference transcriptomes of *P. sylvestris*  
360 [33] and a more detailed description of the plant material and RNA extraction procedure is  
361 described by Ojeda et al. [33]. Needle, phloem, and bud samples were stored immediately in  
362 RNAlater (Thermo Fisher Scientific) or frozen *in situ* and transported to the storage on dry ice.  
363 Samples were stored at -80°C (samples in dry ice) or -20°C (samples in RNAlater) until RNA  
364 extraction. We obtained megagametophyte and embryo tissues by dissecting mature seeds  
365 collected from the same mother trees from which the vegetative tissues were obtained. Seeds were  
366 stored in the dark at 4°C until germination was induced by exposure to moisture and continuous  
367 light for 48 h.

368

### 369 **RNA isolation, library preparation and sequencing**

370 We extracted total RNA from needle, bud, and phloem using the Spectrum Plant Total RNA Kit  
371 (Protocol B, Sigma). Total RNA extraction was followed by mRNA capture with the NEBNext®  
372 Poly(A) mRNA Magnetic Isolation Module (New England Biolabs Inc.). For embryo and  
373 megagametophyte, mRNA was directly extracted from the whole tissues with Dynabeads mRNA  
374 Direct Micro Kit (Thermo Fisher Scientific) according to manufacturer's protocol, except for using  
375 200 µl of lysis buffer. RNA concentration was quantified with Qubit RNA HS Assay kit (Thermo  
376 Fisher Scientific). We prepared a total of 30 libraries using the NEBNext Ultra Directional RNA  
377 Library Prep Kit for Illumina (New England Biolabs Inc.). We selected an insert size of 300 bp by  
378 using a fragmentation time of 5-12 min, followed by size selection with 40-45 µl / 20 µl AMPure XP  
379 beads (Agencourt). Libraries were single indexed with NEBNext Multiplex Oligos Set 1 for Illumina,  
380 and finally enriched with 12-15 PCR cycles. We quantified the libraries and visually checked the  
381 fragment size distribution before sequencing. We used paired-end (2 x 150 bp) and sequenced five

382 pools of 6 to 12 libraries on an Illumina NextSeq 500 at the Biocenter Oulu Sequencing Centre  
383 (Oulu, Finland).

384

### 385 **Transcript quantification**

386 We used trimmed reads (BioProject PRJNA531617) as input for transcript quantification, using the  
387 Trinity<sub>guided</sub> [8] as a reference transcriptome (Data S12). We followed the Trinity Post-  
388 Transcriptome Assembly Downstream Analyses pipeline (Trinity v. 2.6.6) [71, 72] to generate  
389 quantification files at isoform level, and raw counts and normalized count matrices at putative gene  
390 level (hereafter referred as gene level matrices). We first obtained transcript abundance  
391 independently for each of the six individuals in each one of the five tissues. This was done by  
392 pseudo-aligning the RNA-seq reads to the transcriptome reference with Salmon 0.9.1 [73] using the  
393 --SS\_lib\_type (strand specific) and --trinity\_mode options. The --trinity\_mode option allowed the  
394 estimation of counts from isoforms to generate counts at a putative gene level during the count  
395 matrix generation step. Before any further analysis, we checked for the presence of possible  
396 contaminants by searching contigs that had hits to the keywords 'alveolata', 'metazoa', 'fungi',  
397 'bacteria', and 'archaea'. We search for exact matches to these keywords from the results of a  
398 translated blast (BLASTX) of the transcriptome annotation file [33, 39]. We then combined our list  
399 of putative contaminants with the contaminants and organelles contigs lists reported in Ojeda et al.  
400 [33], and excluded them from the isoform quantification files and the gene\_trans\_map.  
401 Contaminants were removed after the pseudo-aligning stage to avoid the false mapping of  
402 contaminant reads to non-contaminant contigs in the reference transcriptome.

403

## 404 **Abundance matrices construction**

405 We built three count matrices with the Trinity pipeline (abundance\_estimates\_to\_matrix.pl) at the  
406 gene level based on the cleaned independent transcript quantification. First, we generated a gene  
407 level raw counts matrix (Table S2), which was then used to construct a transcript per million length  
408 normalized gene count matrix (TPM escalated matrix) (Table S16). The TPM escalated matrix  
409 accounts for differences in isoform lengths that otherwise could inflate FDR due to differential  
410 transcript usage [74] . Finally, the TPM escalated matrix was used to construct a gene counts matrix  
411 normalized using the Trimmed Mean of M values (TMM) method (Table S17), which accounts for  
412 differences in the distribution of transcript expression that could lead to an increase in false positive  
413 rates, and decrease the power to detect truly differentially expressed genes [75]. Before doing the  
414 differential expression analyses and the estimation of tissue specificity, we evaluated the quality of  
415 our samples by doing a principal component analysis (PCA) and a Pearson correlation matrix using  
416 the gene raw count matrix, according to the Trinity QC samples and biological replicates pipeline  
417 [72]. The intention of these analyses was to look for the presence of batch effects or sample  
418 outliers, and to verify that biological replicates clustered within each tissue type and not among  
419 sampled individuals.

420

## 421 **Differential expression analysis and identification of tissue preferentially upregulated genes.**

422 Differentially expressed genes (DEG) and PUR genes were identified using the Trinity Differential  
423 Expression and Sample-Specific Expression pipelines [72, 76]. Briefly, we first identified DEG using  
424 the gene raw counts matrix with edgeR 3.28.0 [77, 78]. The differential expression analysis was  
425 based on pairwise comparisons of each of the 5 tissues (10 pairs), using the six samples per tissue  
426 as biological replicates.

427 For each pair of DEG identified we obtained their associated false discovery rate (FDR), and  
428 then we used this information combined with the normalized counts of the TMM matrix to identify  
429 the PUR genes in each of the five tissues. We obtained a normalized mean value of expression for  
430 each tissue by averaging and log 2 transforming the counts for each gene across the six replicates  
431 for each tissue on the TMM gene matrix. Each DEG with a maximum FDR of 0.05 for differential  
432 expression and with positive logFC of the log2 transformed gene counts in the TMM matrix was  
433 classified as PUR. A summary of pairwise expression differences between tissues based on the  
434 logFC of the log2 transformed gene counts in the TMM matrix is provided in Data S13.

435

### 436 **Tissue-specific expression**

437 As an alternative approach to quantitatively assess the tissue-specific expression of the genes we  
438 calculated the  $\tau$  index based on the TMM gene counts matrix. The  $\tau$  index ranges between 0 for  
439 widely expressed genes, and 1 for exclusively tissue-specific genes [79] . As the  $\tau$  index considers  
440 tissue specificity independently of the level of expression, we set as “not expressed” genes with  
441 expression values  $< 1$  from our TMM matrix in order to exclude genes with low support for true  
442 expression and low signal to noise ratio. To do this, we first log2 transformed the matrix in order to  
443 normalize the distribution of the expression values. We set all negative values in the matrix to zero,  
444 as this represented values  $< 1$  before log2 transformation. We excluded contigs that had no  
445 expression values or that had expression in just one out of the 30 samples. Then, the  $\tau$  index was  
446 computed separately for each gene across all tissues and replicates according to the following  
447 equation [79, 80] :

448

$$449 \tau = \frac{\sum_{i=1}^N (1-X_i)}{N-1}, X_i = \frac{x_i}{\max(x_i)} \text{ where } \max(x_i) \ 1 \leq i \leq N$$

450

451 Where  $N$  represents the number of tissues,  $x_i$  is the mean expression in tissue  $i$  and  $X_i$  is the  
452 expression level in tissue  $i$  normalized by the maximum mean expression among all tissues [81].

### 453 **Singular enrichment analysis**

454 To further characterize the gene expression in the five tissues, we identified the biological pathways  
455 for both tissue-specific and tissue preferentially upregulated gene sets with independent singular  
456 enrichment analysis (SEA) [82, 83]. First, we retrieved the UniProt IDs corresponding to our putative  
457 genes from the blastx field from our reference annotation file [33]. Then we uploaded the list of  
458 UniProt IDs to the uniprot retrieve/ID mapping tool [84] and restricted the result to GO terms only.  
459 We repeated this procedure with the genes used as a background list for the SEA: all the contigs in  
460 the gene raw counts matrix for the PUR genes (Data S14), and all the contigs in the filtered TMM  
461 matrix in the case of the tissue-specific genes (Data S15).

462 Of the 715,398 putative genes in the raw counts matrix used for the differential expression  
463 analysis, 17,227 have a unique UniProt ID and represent 108,947 GO terms. The background list  
464 for the tissue-specific genes data set consisted of 177,075 contigs of which 14,079 have a unique  
465 annotation and represent 90,198 GO terms. For both data sets only uniquely annotated genes and  
466 their corresponding GO terms (Data S2-S11) were used for running the singular enrichment  
467 analyses to avoid inflating the number of GO terms falsely, and creating a bias in the analysis.

468 We used the GO terms along the UniProt IDs as input for the SEA using the agriGO platform  
469 [83, 85, 86]. We used the custom background list option, applied a hypergeometric test as statistical  
470 test method with a minimum of 5 mapping entries per term, and Hochberg FDR as multi-test  
471 adjustment method with a significance level of 0.05.

472 **Declarations**

473 **Ethics approval and consent to participate**

474 Not applicable

475

476 **Consent for publication**

477 Not applicable

478

479 **Availability of data and material**

480 Clean reads corresponding to each of the five tissues used in the transcript quantification can be  
481 found in BioProject PRJNA531617. The Trinotate file used to obtain the gene identifiers for the  
482 tissue PUR and tissue-specific genes identified in this work is at

483 <https://doi.org/10.6084/m9.figshare.12865997.v1>.

484 Supplementary information files:

485 Data S1 list of putative contaminant contigs removed from quantification files.txt

486 Data S12.Trinity\_guided\_with\_contaminants.fasta

487 Data S13.DE\_pairwise\_summary.txt

488 Table S2. raw counts matrix.txt

489 Table S3. Filtered TMM\_Tau\_final\_matrix.txt

490 Table S4. CombinedTissueExpressionInfo.txt

491 Table S16.TPM.not\_cross\_norm.matrix.txt

492 Table S17.TMM.EXPR.matrix.txt

493 from this work are available in the Figshare repository,

494 <https://doi.org/10.6084/m9.figshare.c.5181788>.

#### 495 **Competing interest**

496 The authors declare that they have no competing interests.

497

#### 498 **Funding**

499 The Academy of Finland grants 287431, 293819, and 319313 to TP. Part of the work was carried  
500 out with the support of Biocenter Oulu to SC.

501

#### 502 **Authors' contributions**

503 SC: Main responsibility of the statistical and bioinformatic analyses, main responsibility of writing the  
504 manuscript.

505 JV: Writing parts of the manuscript, editing and commenting the manuscript.

506 DP: Visualization of the data, editing and commenting the manuscript.

507 TP: Concept, laboratory work, acquisition of funding, writing and editing the manuscript.

508

#### 509 **Acknowledgments**

510 The authors wish to acknowledge CSC – IT Center for Science, Finland, for computational  
511 resources.

512

513

514



## 515 Bibliography

- 516 1. Farjon A. A natural history of conifers. 2008.
- 517 2. San-Miguel-Ayanz J, De Rigo D, Caudullo G, Durrant TH, Mauri A. European atlas of forest tree  
518 species. Publications Office of the European Union; 2016.
- 519 3. الكتاب السنوي للمنتجات الحرجية | 粮农组织林产品年鉴 | FAO Yearbook of Forest Products | Annuaire  
520 FAO des produits forestiers | Ежегодник лесной продукции ФАО | Anuario FAO de productos  
521 forestales 2018. 2020. doi:10.4060/cb0513m.
- 522 4. Bonan GB, Chapin FS, Thompson SL. Boreal forest and tundra ecosystems as components of  
523 the climate system. *Clim Change*. 1995;29:145–67.
- 524 5. Boonstra R, Andreassen HP, Boutin S, Hušek J, Ims RA, Krebs CJ, et al. Why Do the Boreal  
525 Forest Ecosystems of Northwestern Europe Differ from Those of Western North America?  
526 *Bioscience*. 2016;66:722–34.
- 527 6. DeAngelis DL. Boreal Forest. *Encyclopedia of Ecology*. 2008;:493–5. doi:10.1016/b978-  
528 008045405-4.00319-0.
- 529 7. Nystedt B, Street NR, Wetterbom A, Zuccolo A, Lin Y-C, Scofield DG, et al. The Norway spruce  
530 genome sequence and conifer genome evolution. *Nature*. 2013;497:579–84.
- 531 8. Stevens KA, Wegrzyn JL, Zimin A, Puiu D, Crepeau M, Cardeno C, et al. Sequence of the Sugar  
532 Pine Megagenome. *Genetics*. 2016;204:1613–26.
- 533 9. Mosca E, Cruz F, Gómez-Garrido J, Bianco L, Rellstab C, Brodbeck S, et al. A Reference  
534 Genome Sequence for the European Silver Fir (*Abies alba* Mill.): A Community-Generated Genomic  
535 Resource. *G3*. 2019;9:2039–49.
- 536 10. Birol I, Raymond A, Jackman SD, Pleasance S, Coope R, Taylor GA, et al. Assembling the 20  
537 Gb white spruce (*Picea glauca*) genome from whole-genome shotgun sequencing data.  
538 *Bioinformatics*. 2013;29:1492–7.
- 539 11. Zimin A, Stevens KA, Crepeau MW, Holtz-Morris A, Koriabine M, Marçais G, et al. Sequencing  
540 and assembly of the 22-gb loblolly pine genome. *Genetics*. 2014;196:875–90.
- 541 12. Cañas RA, Pascual MB, Fernando N, Ávila C, Cánovas FM. Resources for conifer functional  
542 genomics at the omics era. In: *Advances in Botanical Research*. Elsevier; 2019. p. 39–76.
- 543 13. Wegrzyn JL, Liechty JD, Stevens KA, Wu L-S, Loopstra CA, Vasquez-Gross HA, et al. Unique  
544 features of the loblolly pine (*Pinus taeda* L.) megagenome revealed through sequence annotation.  
545 *Genetics*. 2014;196:891–909.
- 546 14. Zonneveld BJM. Conifer genome sizes of 172 species, covering 64 of 67 genera, range from 8  
547 to 72 picogram. *Nord J Bot*. 2012;30:490–502.
- 548 15. De La Torre AR, Piot A, Liu B, Wilhite B, Weiss M, Porth I. Functional and morphological  
549 evolution in gymnosperms: A portrait of implicated gene families. *Evol Appl*. 2020;13:210–27.

- 550 16. Neale DB, Wegrzyn JL, Stevens KA, Zimin AV, Puiu D, Crepeau MW, et al. Decoding the  
551 massive genome of loblolly pine using haploid DNA and novel assembly strategies. *Genome Biol.*  
552 2014;15:R59.
- 553 17. Baker EAG, Wegrzyn JL, Sezen UU, Falk T, Maloney PE, Vogler DR, et al. Comparative  
554 Transcriptomics Among Four White Pine Species. *G3* . 2018;8:1461–74.
- 555 18. Wegrzyn JL, Falk T, Grau E, Buehler S, Ramnath R, Herndon N. Cyberinfrastructure and  
556 resources to enable an integrative approach to studying forest trees. *Evol Appl.* 2020;13:228–41.
- 557 19. Raherison E, Rigault P, Caron S, Poulin P-L, Boyle B, Verta J-P, et al. Transcriptome profiling in  
558 conifers and the PiceaGenExpress database show patterns of diversification within gene families  
559 and interspecific conservation in vascular gene expression. *BMC Genomics.* 2012;13:434.
- 560 20. Merino I, Abrahamsson M, Sterck L, Craven-Bartle B, Canovas F, von Arnold S. Transcript  
561 profiling for early stages during embryo development in Scots pine. *BMC Plant Biol.* 2016;16:255.
- 562 21. Little SA, Boyes IG, Donaleshen K, von Aderkas P, Ehling J. A transcriptomic resource for  
563 Douglas-fir seed development and analysis of transcription during late megagametophyte  
564 development. *Plant Reprod.* 2016;29:273–86.
- 565 22. Canas RA, Li Z, Pascual MB. The gene expression landscape of pine seedling tissues. *The*  
566 *Plant.* 2017. <https://onlinelibrary.wiley.com/doi/abs/10.1111/tbj.13617>.
- 567 23. Tyrmi JS, Vuosku J, Acosta JJ, Li Z, Sterck L, Cervera MT, et al. Genomics of Clinal Local  
568 Adaptation in *Pinus sylvestris* Under Continuous Environmental and Spatial Genetic Setting. *G3:*  
569 *Genes|Genomes|Genetics.* 2020;10:2683–96. doi:10.1534/g3.120.401285.
- 570 24. Rellstab C, Dauphin B, Zoller S, Brodbeck S, Gugerli F. Using transcriptome sequencing and  
571 pooled exome capture to study local adaptation in the giga-genome of *Pinus cembra*. *Mol Ecol*  
572 *Resour.* 2019;19:536–51.
- 573 25. Wright SI, Yau CBK, Looseley M, Meyers BC. Effects of gene expression on molecular evolution  
574 in *Arabidopsis thaliana* and *Arabidopsis lyrata*. *Mol Biol Evol.* 2004;21:1719–26.
- 575 26. Slotte T, Bataillon T, Hansen TT, St Onge K, Wright SI, Schierup MH. Genomic determinants of  
576 protein evolution and polymorphism in *Arabidopsis*. *Genome Biol Evol.* 2011;3:1210–9.
- 577 27. Otto SP, Scott MF, Immler S. Evolution of haploid selection in predominantly diploid organisms.  
578 *Proc Natl Acad Sci U S A.* 2015;112:15952–7.
- 579 28. Pyhäjärvi T, Kujala ST, Savolainen O. 275 years of forestry meets genomics in. *Evol Appl.*  
580 2020;13:11–30.
- 581 29. Williams CG. Selfed embryo death in *Pinus taeda*: a phenotypic profile. *New Phytol.*  
582 2008;178:210–22.
- 583 30. Verta JP, Landry CR, MacKay J. Dissection of expression-quantitative trait locus and allele  
584 specificity using a haploid/diploid plant system—insights into compensatory evolution of  
585 transcriptional .... *New Phytol.* 2016. <https://nph.onlinelibrary.wiley.com/doi/abs/10.1111/nph.13888>.
- 586 31. Höllbacher B, Schmitt AO, Hofer H, Ferreira F, Lackner P. Identification of Proteases and

- 587 Protease Inhibitors in Allergenic and Non-Allergenic Pollen. *Int J Mol Sci.* 2017;18.  
588 doi:10.3390/ijms18061199.
- 589 32. Wachowiak W, Trivedi U, Perry A, Cavers S. Comparative transcriptomics of a complex of four  
590 European pine species. *BMC Genomics.* 2015;16:234.
- 591 33. Ojeda DI, Mattila TM, Ruttink T, Kujala ST, Kärkkäinen K, Verta J-P, et al. Utilization of Tissue  
592 Ploidy Level Variation in de Novo Transcriptome Assembly of *Pinus sylvestris*. *G3* . 2019;9:3409–  
593 21.
- 594 34. Perry A, Wachowiak W, Downing A, Talbot R, Cavers S. Development of a SNP array for  
595 population genomic studies in four European pine species. *Mol Ecol Resour.* 2020.  
596 doi:10.1111/1755-0998.13223.
- 597 35. Li Z, De La Torre AR, Sterck L, Cánovas FM, Avila C, Merino I, et al. Single-Copy Genes as  
598 Molecular Markers for Phylogenomic Studies in Seed Plants. *Genome Biol Evol.* 2017;9:1130–47.
- 599 36. Brawand D, Soumillon M, Necsulea A, Julien P, Csárdi G, Harrigan P, et al. The evolution of  
600 gene expression levels in mammalian organs. *Nature.* 2011;478:343–8.
- 601 37. Yang R, Wang X. Organ evolution in angiosperms driven by correlated divergences of gene  
602 sequences and expression patterns. *Plant Cell.* 2013;25:71–82.
- 603 38. Gonzalez-Ibeas D, Martinez-Garcia PJ, Famula RA, Delfino-Mix A, Stevens KA, Loopstra CA, et  
604 al. Assessing the Gene Content of the Megagenome: Sugar Pine (*Pinus lambertiana*). *G3* .  
605 2016;6:3787–802.
- 606 39. Ojeda D. *Pinus sylvestris* transcriptome annotation-Trinotate. Utilization of Tissue Ploidy Level  
607 Variation in de Novo Transcriptome Assembly of *Pinus sylvestris*. 2020.  
608 doi:10.6084/m9.figshare.12865997.v1.
- 609 40. Bairoch A, Apweiler R. The SWISS-PROT protein sequence database and its supplement  
610 TrEMBL in 2000. *Nucleic Acids Res.* 2000;28:45–8.
- 611 41. Lemos B, Meiklejohn CD, Cáceres M, Hartl DL. Rates of divergence in gene expression profiles  
612 of primates, mice, and flies: stabilizing selection and variability among functional categories.  
613 *Evolution.* 2005;59:126–37.
- 614 42. Ralph S, Park J-Y, Bohlmann J, Mansfield SD. Dirigent proteins in conifer defense: gene  
615 discovery, phylogeny, and differential wound- and insect-induced expression of a family of DIR and  
616 DIR-like genes in spruce (*Picea* spp.). *Plant Mol Biol.* 2006;60:21–40.
- 617 43. Mir G, Domènech J, Huguet G, Guo W-J, Goldsbrough P, Atrian S, et al. A plant type 2  
618 metallothionein (MT) from cork tissue responds to oxidative stress. *J Exp Bot.* 2004;55:2483–93.
- 619 44. Lorenz WW, Dean JFD. SAGE profiling and demonstration of differential gene expression along  
620 the axial developmental gradient of lignifying xylem in loblolly pine (*Pinus taeda*). *Tree Physiol.*  
621 2002;22:301–10.
- 622 45. Pongrac P, Baltreinaite E, Vavpetič P, Kelemen M, Kladnik A, Budič B, et al. Tissue-specific  
623 element profiles in Scots pine (*Pinus sylvestris* L.) needles. *Trees.* 2019;33:91–101.

- 624 46. Singh H. Embryology of Gymnosperms. 1978.
- 625 47. Vuosku J, Sutela S, Kestilä J, Jokela A, Sarjala T, Häggman H. Expression of catalase and  
626 retinoblastoma-related protein genes associates with cell death processes in Scots pine zygotic  
627 embryogenesis. *BMC Plant Biol.* 2015;15:88.
- 628 48. Simola LK. The Ultrastructure of Dry and Germinating Seeds of *Pinus Sylvestris* L. *Societas pro*  
629 *Fauna et Flora Fennica*; 1974.
- 630 49. Achotegui-Castells A, Llusà J, Hódar JA, Peñuelas J. Needle terpene concentrations and  
631 emissions of two coexisting subspecies of Scots pine attacked by the pine processionary moth  
632 (*Thaumetopoea pityocampa*). *Acta Physiologiae Plantarum.* 2013;35:3047–58. doi:10.1007/s11738-  
633 013-1337-3.
- 634 50. Geldner N. Making phloem--a near-death experience. *Science.* 2014;345:875–6.  
635 doi:10.1126/science.1258711.
- 636 51. King JE, Gifford DJ. Amino Acid Utilization in Seeds of Loblolly Pine during Germination and  
637 Early Seedling Growth (I. Arginine and Arginase Activity). *Plant Physiol.* 1997;113:1125–35.
- 638 52. Costa LM, Gutiérrez-Marcos JF, Dickinson HG. More than a yolk: the short life and complex  
639 times of the plant endosperm. *Trends Plant Sci.* 2004;9:507–14.
- 640 53. Williams JH, Friedman WE. Identification of diploid endosperm in an early angiosperm lineage.  
641 *Nature.* 2002;415:522–6. doi:10.1038/415522a.
- 642 54. Baroux C, Spillane C, Grossniklaus U. Evolutionary origins of the endosperm in flowering plants.  
643 *Genome Biol.* 2002;3:reviews1026.
- 644 55. Ching TM. Glyoxysomes in megagametophyte of germinating ponderosa pine seeds. *Plant*  
645 *Physiol.* 1970;46:475–82.
- 646 56. Graham IA. Seed Storage Oil Mobilization. *Annual Review of Plant Biology.* 2008;59:115–42.  
647 doi:10.1146/annurev.arplant.59.032607.092938.
- 648 57. Xu J, Jun XU, Wang X-Y, Wang-zhen GUO. The cytochrome P450 superfamily: Key players in  
649 plant development and defense. *Journal of Integrative Agriculture.* 2015;14:1673–86.  
650 doi:10.1016/s2095-3119(14)60980-1.
- 651 58. Jeevan Kumar SP, Rajendra Prasad S, Banerjee R, Thammineni C. Seed birth to death: dual  
652 functions of reactive oxygen species in seed physiology. *Ann Bot.* 2015;116:663–8.
- 653 59. Seo M, Nambara E, Choi G, Yamaguchi S. Interaction of light and hormone signals in  
654 germinating seeds. *Plant Mol Biol.* 2009;69:463–72.
- 655 60. Guangwu Z, Xuwen J. Roles of Gibberellin and Auxin in Promoting Seed Germination and  
656 Seedling Vigor in *Pinus massoniana*. *Forest Science.* 2014;60:367–73. doi:10.5849/forsci.12-143.
- 657 61. Miransari M, Smith DL. Plant hormones and seed germination. *Environmental and Experimental*  
658 *Botany.* 2014;99:110–21. doi:10.1016/j.envexpbot.2013.11.005.
- 659 62. Shu K, Liu X-D, Xie Q, He Z-H. Two Faces of One Seed: Hormonal Regulation of Dormancy

- 660 and Germination. *Mol Plant*. 2016;9:34–45.
- 661 63. Otegui MS. Endosperm Cell Walls: Formation, Composition, and Functions. *Plant Cell*  
662 *Monographs*. :159–77. doi:10.1007/7089\_2007\_113.
- 663 64. Yan D, Duermeyer L, Leoveanu C, Nambara E. The functions of the endosperm during seed  
664 germination. *Plant Cell Physiol*. 2014;55:1521–33.
- 665 65. Szmidt AE, Muona O. Linkage relationships of allozyme loci in *Pinus sylvestris*. *Hereditas*.  
666 1989;111:91–7. doi:10.1111/j.1601-5223.1989.tb00382.x.
- 667 66. Paasela T, Lim K-J, Pietiäinen M, Teeri TH. The O-methyltransferase PMT2 mediates  
668 methylation of pinosylvin in Scots pine. *New Phytol*. 2017;214:1537–50.
- 669 67. Duarte GT, Volkova PY, Geras'kin SA. The response profile to chronic radiation exposure based  
670 on the transcriptome analysis of Scots pine from Chernobyl affected zone. *Environ Pollut*.  
671 2019;250:618–26.
- 672 68. Guseva T, Biriukov V, Sadovsky M. Role of Homeobox Genes in the Development of *Pinus*  
673 *Sylvestris*. *Bioinformatics and Biomedical Engineering*. 2020;:429–37. doi:10.1007/978-3-030-  
674 45385-5\_38.
- 675 69. Niinemets Ü. Responses of forest trees to single and multiple environmental stresses from  
676 seedlings to mature plants: Past stress history, stress interactions, tolerance and acclimation.  
677 *Forest Ecology and Management*. 2010;260:1623–39. doi:10.1016/j.foreco.2010.07.054.
- 678 70. EVOLTREE :: Intensive Study Sites. <http://www.evoltree.eu/index.php/intensive-study-sites>.  
679 Accessed 15 Oct 2020.
- 680 71. Haas BJ, Papanicolaou A, Yassour M, Grabherr M, Blood PD, Bowden J, et al. De novo  
681 transcript sequence reconstruction from RNA-seq using the Trinity platform for reference generation  
682 and analysis. *Nat Protoc*. 2013;8:1494–512.
- 683 72. trinityrnaseq. trinityrnaseq. <https://github.com/trinityrnaseq/trinityrnaseq/wiki/>. Accessed 15 Oct  
684 2020.
- 685 73. Patro R, Duggal G, Love MI, Irizarry RA, Kingsford C. Salmon provides fast and bias-aware  
686 quantification of transcript expression. *Nat Methods*. 2017;14:417–9.
- 687 74. Soneson C, Love MI, Robinson MD. Differential analyses for RNA-seq: transcript-level  
688 estimates improve gene-level inferences. *F1000Res*. 2015;4:1521.
- 689 75. Robinson MD, Oshlack A. A scaling normalization method for differential expression analysis of  
690 RNA-seq data. *Genome Biol*. 2010;11:R25.
- 691 76. Bryant DM, Johnson K, DiTommaso T, Tickle T, Couger MB, Payzin-Dogru D, et al. A Tissue-  
692 Mapped Axolotl De Novo Transcriptome Enables Identification of Limb Regeneration Factors. *Cell*  
693 *Rep*. 2017;18:762–76.
- 694 77. Robinson MD, McCarthy DJ, Smyth GK. edgeR: a Bioconductor package for differential  
695 expression analysis of digital gene expression data. *Bioinformatics*. 2010;26:139–40.

- 696 78. McCarthy DJ, Chen Y, Smyth GK. Differential expression analysis of multifactor RNA-Seq  
697 experiments with respect to biological variation. *Nucleic Acids Res.* 2012;40:4288–97.
- 698 79. Yanai I, Benjamin H, Shmoish M, Chalifa-Caspi V, Shklar M, Ophir R, et al. Genome-wide  
699 midrange transcription profiles reveal expression level relationships in human tissue specification.  
700 *Bioinformatics.* 2005;21:650–9.
- 701 80. Kryuchkova-Mostacci N, Robinson-Rechavi M. A benchmark of gene expression tissue-  
702 specificity metrics. *Brief Bioinform.* 2017;18:205–14.
- 703 81. severinEvo. tau.R. Github. [https://github.com/severinEvo/gene\\_expression/blob/master/tau.R](https://github.com/severinEvo/gene_expression/blob/master/tau.R).  
704 Accessed 15 Oct 2020.
- 705 82. Huang DW, Sherman BT, Lempicki RA. Bioinformatics enrichment tools: paths toward the  
706 comprehensive functional analysis of large gene lists. *Nucleic Acids Res.* 2009;37:1–13.
- 707 83. Du Z, Zhou X, Ling Y, Zhang Z, Su Z. agriGO: a GO analysis toolkit for the agricultural  
708 community. *Nucleic Acids Res.* 2010;38 Web Server issue:W64–70.
- 709 84. Retrieve/ID mapping. <https://www.uniprot.org/uploadlists/>. Accessed 15 Oct 2020.
- 710 85. Tian T, Liu Y, Yan H, You Q, Yi X, Du Z, et al. agriGO v2.0: a GO analysis toolkit for the  
711 agricultural community, 2017 update. *Nucleic Acids Res.* 2017;45:W122–9.
- 712 86. agriGO: GO Analysis Toolkit and Database for Agricultural Community.  
713 <http://systemsbiology.cau.edu.cn/agriGOv2/index.php>. Accessed 15 Oct 2020.

714  
715

## 716 **Supplementary information**

717 **Additional file 1: Table S1.** Table including information about the number of reads mapped to each  
718 one of the tissues.

719 **Additional file 2: Data S1.** List of contigs identified as contaminants.

720 **Additional file 3: Table S2.** Table including the raw counts per genes across the five tissues.

721 **Additional file 4: Figure S1.** Heat map showing the correlation between the expression patterns of  
722 the five tissues. A=embryo, KS=vegetative bud, M=megagametophyte, N=needle, Ni=phloem.

723 **Additional file 5: Table S3.** Table including the TMM normalized and filtered counts used for the  
724 identification of genes with tissue-specific expression patterns. A=embryo, KS=vegetative bud,  
725 M=megagametophyte, N=needle, Ni=phloem.

726 **Additional file 6: Table S4.** Table including the level of expression, indication of tissue PUR or  
727 tissue-specific expression, and annotation for 715,398 genes across the five tissues. Column one

728 indicates gene ID, columns two to six contain the TMM normalized gene counts per tissue, column  
729 seven indicates the gene tau score, columns eight to 12 indicate if in which tissue the gene is  
730 preferentially upregulated, column 13 indicates the UniProt ID, column 14 indicates the protein  
731 name, column 15 indicates the gene name, column 16 indicates the organism from where the  
732 annotation was obtained.

733 **Additional file 7: Table S5.** Table containing the results of the SEA for tissue PUR genes  
734 expressed in vegetative bud. Column two indicates the ontological process where P=biological  
735 processes, F=molecular function, C=cellular component.

736 **Additional file 8: Table S6.** Table containing the results of the SEA for tissue PUR genes  
737 expressed in embryo. Column two indicates the ontological process where P=biological processes,  
738 F=molecular function, C=cellular component.

739 **Additional file 9: Table S7.** Table containing the results of the SEA for tissue PUR genes  
740 expressed in megagametophyte. Column two indicates the ontological process where P=biological  
741 processes, F=molecular function, C=cellular component.

742 **Additional file 10: Table S8.** Table containing the results of the SEA for tissue PUR genes  
743 expressed in needle. Column two indicates the ontological process where P=biological processes,  
744 F=molecular function, C=cellular component.

745 **Additional file 11: Table S9.** Table containing the results of the SEA for tissue PUR genes  
746 expressed in phloem. Column two indicates the ontological process where P=biological processes,  
747 F=molecular function, C=cellular component.

748 **Additional file 12: Table S10.** Table containing the results of the SEA for genes with tissue-specific  
749 expression pattern in vegetative bud. Column two indicates the ontological process where  
750 P=biological processes, F=molecular function, C=cellular component.

751 **Additional file 13: Table S11.** Table containing the results of the SEA for genes with tissue-specific  
752 expression pattern in embryo. Column two indicates the ontological process where P=biological  
753 processes, F=molecular function, C=cellular component.

754 **Additional file 14: Table S12.** Table containing the results of the SEA for genes with tissue-specific  
755 expression pattern in megagametophyte. Column two indicates the ontological process where  
756 P=biological processes, F=molecular function, C=cellular component.

757 **Additional file 15: Table S13.** Table containing the results of the SEA for genes with tissue-specific  
758 expression pattern in needle. Column two indicates the ontological process where P=biological  
759 processes, F=molecular function, C=cellular component.

760 **Additional file 16: Table S14.** Table containing the results of the SEA for genes with tissue-specific  
761 expression pattern in phloem. Column two indicates the ontological process where P=biological  
762 processes, F=molecular function, C=cellular component.

763 **Additional file 17: Data S2.** Genes identified in vegetative bud with PUR expression pattern and  
764 their associated GO terms.

765 **Additional file 18: Data S3.** Genes identified in embryo with PUR expression pattern and their  
766 associated GO terms.

767 **Additional file 19: Data S4.** Genes identified in megagametophyte with PUR expression pattern  
768 and their associated GO terms.

769 **Additional file 20: Data S5.** Genes identified in needle with PUR expression pattern and their  
770 associated GO terms.

771 **Additional file 21: Data S6.** Genes identified in phloem with PUR expression pattern and their  
772 associated GO terms.

773 **Additional file 22: Data S7.** Genes identified in vegetative bud with tissue-specific expression  
774 pattern and their associated GO terms.

775 **Additional file 23: Data S8.** Genes identified in embryo with tissue-specific expression pattern and  
776 their associated GO terms.

777 **Additional file 24: Data S9.** Genes identified in megagametophyte with tissue-specific expression  
778 pattern and their associated GO terms.

779 **Additional file 25: Data S10.** Genes identified in needle with tissue-specific expression pattern and  
780 their associated GO terms.

781 **Additional file 26: Data S11.** Genes identified in phloem with tissue-specific expression pattern  
782 and their associated GO terms.

783 **Additional file 27: Table S15.** Table with information about the geographical location of the trees  
784 used in this study.

785 **Additional file 28: Data S12.** Trinity<sub>guided</sub> transcriptome used as reference (contaminants included).



786 **Additional file 29: Table S16.** Table containing the TPM normalized gene counts. A=embryo,  
787 KS=vegetative bud, M=megagametophyte, N=needle, Ni=phloem  
788 **Additional file 30: Table S17.** Table containing the TMM normalized unfiltered gene counts.  
789 A=embryo, KS=vegetative bud, M=megagametophyte, N=needle, Ni=phloem  
790 **Additional file 31: Data S13.** Pairwise expression differences between tissues.  
791 **Additional file 32: Data S14.** List of genes used as a background list for the SEA of PUR genes.  
792 **Additional file 33: Data S15.** List of genes used as a background list for the SEA of tissue-specific  
793 genes.
